# Supplementary material for: U–Pb ID-TIMS geochronology using ATONA amplifiers
Source: Royal Society of Chemistry journal article supplement (doi:10.1039/d0ja00135j), 2020-01-01
Supplement: d0ja00135j2.xlsx [file d0ja00135j2.xlsx]

## Sheet: ESI Table
	Dates (Ma)							Composition				Isotopic Ratios									Average intensity [V]
	206Pb/	±2σ	207Pb/	±2σ	207Pb/	±2σ		Th/	Pb*	Pbc	Pb*/	206Pb/	206Pb/		207Pb/		207Pb/		Corr.
Fraction	238U a	abs	235U a	abs	206Pb a	abs	% disc b	U c	(pg) d	(pg) e	Pbc f	204Pb g	238U h	±2σ %	235U h	±2σ %	206Pb h	±2σ %	coef.		205Pb	206Pb	207Pb
EarlyTime 4567-R
1019DS1	4551.93	2.51021	4557.37	0.874859	4559.79	0.758176	0.172377	1.23817	52.4535	0.923917	56.773	2202.6	1.02611	0.0768883	87.9727	0.0871399	0.622082	0.040881	0.803561		0.00412327	0.00562146	0.00350449
1019DS2	4551.6	3.11494	4556.96	1.03995	4559.34	0.773566	0.16977	1.23727	59.6173	1.0722	55.6029	2158.05	1.02601	0.0954164	87.9362	0.103584	0.621888	0.0422301	0.859222		0.00166499	0.00227101	0.00141578
1019DS3	4553.01	2.58313	4557.71	0.887487	4559.8	0.755703	0.148777	1.23795	61.118	1.08555	56.3013	2184.54	1.02645	0.0791091	88.0025	0.0883974	0.622086	0.0406624	0.81172		0.00497136	0.00678004	0.00422823
1019DS4	4551.15	2.42828	4557.2	0.841989	4559.88	0.752555	0.191523	1.23798	67.5211	1.1903	56.7259	2200.78	1.02587	0.0743875	87.9575	0.083866	0.622123	0.0403837	0.791047		0.0038501	0.00525176	0.00327564
1019DS5	4552.69	3.3372	4557.6	1.11004	4559.78	0.787716	0.155614	1.23782	66.8471	1.19352	56.0084	2173.31	1.02635	0.102208	87.9927	0.110565	0.622079	0.0434594	0.872351		0.00152054	0.00207336	0.00129268
1019DS6	4553.53	2.7235	4558.08	0.923513	4560.1	0.835668	0.144097	1.23817	55.2309	1.07251	51.4966	1999.52	1.02661	0.0834013	88.0348	0.0919853	0.622216	0.0475345	0.788053		0.00476058	0.00649621	0.00405204
1019DS7	4551.65	2.74453	4557.27	0.930591	4559.77	0.765254	0.178076	1.23782	54.8884	0.988643	55.519	2154.46	1.02602	0.0840691	87.9638	0.0926912	0.622073	0.0415042	0.825832		0.0044841	0.00611415	0.00381231
1019DS8	4551.75	2.44369	4557.48	0.844881	4560.02	0.752739	0.181527	1.23841	111.823	1.96341	56.9536	2209.37	1.02605	0.074853	87.9819	0.0841538	0.622182	0.0404005	0.792684		0.00397305	0.00541867	0.00337947
EarthTime 2Ga
0919DS1	1999.85	1.1347	1999.18	1.02409	1998.47	1.78172	-0.0690326	0.0911974	12.3271	0.127833	96.4313	6257.62	0.363735	0.0659945	6.16271	0.117223	0.122936	0.0948181	0.519642		0.00176662	0.00297948	0.000373143
0919DS2	1999.99	1.4759	1999.68	1.37036	1999.35	2.26728	-0.0317404	0.0908977	10.6	0.120454	88.0009	5712.31	0.363763	0.0858336	6.16623	0.156847	0.122997	0.123377	0.582361		0.00130566	0.0022034	0.000276571
0919DS4	2000.36	0.994276	2000.19	0.936986	2000.01	1.595	-0.017719	0.090819	14.5463	0.148929	97.6725	6337.94	0.363842	0.0578149	6.16984	0.107236	0.123042	0.0836416	0.546789		0.00221112	0.00372908	0.00046713
0919DS5	1999.71	1.01583	2000.3	0.965573	2000.92	1.68812	0.0607244	0.0906649	14.5848	0.16437	88.7318	5759.38	0.363704	0.0590846	6.17067	0.110505	0.123106	0.0892565	0.510749		0.00173768	0.00293037	0.000368016
0919DS6	1998.86	1.05377	1999.32	0.978052	1999.8	1.38169	0.046696	0.0906175	24.1956	0.222053	108.963	7068.88	0.363525	0.0613133	6.16373	0.111951	0.123028	0.0705935	0.746113		0.00150862	0.00254256	0.00031795
0919DS7	1999.54	0.628628	1999.58	0.632206	1999.62	1.11732	0.00375352	0.0912034	23.5013	0.198423	118.441	7681.04	0.363669	0.036566	6.16556	0.0723613	0.123016	0.0537561	0.494598		0.00457434	0.00770909	0.000962892
0919DS8	1999.39	1.54166	1999.69	0.934235	2000	1.06132	0.030411	0.0913536	29.2944	0.229447	127.674	8277.9	0.363636	0.0896811	6.16631	0.106929	0.123042	0.0500347	0.829392
0919DS9	1999.11	0.591421	1999.4	0.667209	1999.7	1.1982	0.0295082	0.0910053	34.5488	0.29568	116.845	7578.16	0.363578	0.0344081	6.16429	0.0763698	0.123021	0.0590189	0.469395		0.00315478	0.00531604	0.000664119
0919DS10	1999.14	0.443311	1999.14	0.577583	1999.14	1.05673	0.000129589	0.0909907	39.2292	0.320858	122.263	7929.01	0.363583	0.025791	6.16243	0.0661139	0.122982	0.0497189	0.439294		0.00551099	0.00928532	0.00115904
0919DS11	1999.45	0.388725	1999.9	0.594782	2000.38	1.13266	0.046594	0.0913097	51.9343	0.458635	113.237	7343.85	0.363649	0.0226123	6.16785	0.0680743	0.123068	0.0549426	0.350633		0.00446286	0.00752037	0.000940113
0919DS12	1999.22	0.346831	1999.51	0.543799	1999.81	1.02645	0.0294265	0.0911237	72.9705	0.5596	130.398	8454.67	0.363601	0.0201772	6.16508	0.062243	0.123028	0.0478696	0.375252		0.00406286	0.00684562	0.000854024
0919DS13	1999.05	0.392191	1999.07	0.624026	1999.1	1.19146	0.00233904	0.0912069	82.297	0.62128	132.464	8588.52	0.363565	0.0228178	6.162	0.0714308	0.122979	0.0587408	0.345195		0.00379987	0.00639999	0.000797861
0919DS14	1998.79	0.334381	1999.92	0.597041	2001.08	1.05844	0.114209	0.0913121	96.2569	0.72559	132.66	8599.96	0.363511	0.0194565	6.16794	0.0683326	0.123117	0.0498495	0.562911		0.00325844	0.00548735	0.000684579
0919DS15	1998.99	0.417008	1999.42	0.53334	1999.87	0.978225	0.0441824	0.0910886	103.166	0.760105	135.725	8799.38	0.363552	0.0242622	6.16445	0.0610468	0.123033	0.0443428	0.433097		0.00747499	0.0124619	0.00156932
0919DS16	1998.94	0.233494	1999.4	0.518676	1999.88	1.01605	0.0467157	0.0912541	177.797	1.41988	125.22	8119.37	0.363542	0.0135854	6.16431	0.0593685	0.123033	0.0469609	0.271353		0.014697	0.0247572	0.00308965
GZ7
single fragments
z1	530.459	0.186476	530.933	0.215454	532.973	0.746267	0.471732	0.893876	1367.99	0.231157	5918.03	328737	0.0857679	0.0366199	0.686895	0.05211	0.0581112	0.0097634	0.758546		0.00235591	0.0560232	0.00325553
z2	530.419	0.133872	530.857	0.191965	532.738	0.803414	0.435261	0.892899	345.201	0.159167	2168.79	120513	0.0857612	0.0262915	0.686768	0.0464341	0.058105	0.0167305	0.614882		0.00275983	0.0281934	0.001641
z3	530.199	0.185484	530.737	0.218082	533.05	0.789937	0.534762	0.893725	378.777	0.136906	2766.69	153700	0.0857241	0.0364421	0.686569	0.0527606	0.0581133	0.0153385	0.730819		0.00352482	0.0402422	0.00234077
z4	530.143	0.17178	530.697	0.221718	533.08	0.9839	0.550874	0.894489	504.103	0.144343	3492.4	193976	0.0857147	0.0337531	0.686503	0.0536433	0.0581141	0.0308683	0.551711		0.00126895	0.016928	0.000984505
z5	530.412	0.22723	530.798	0.330025	532.455	1.30388	0.383683	0.889922	421.663	0.55958	753.535	41913.2	0.08576	0.0446269	0.68667	0.0798359	0.0580975	0.0497879	0.67648		0.000935939	0.0111671	0.000652626
z6	530.533	0.328532	531.29	0.313191	534.544	0.883241	0.750362	0.89089	607.482	0.189098	3212.52	178578	0.0857803	0.064508	0.687488	0.0757103	0.0581529	0.0236999	0.846196		0.000962629	0.0140602	0.00081805
z7	530.262	0.130516	530.838	0.207427	533.319	0.89988	0.573285	0.88983	351.307	0.417918	840.613	46754.6	0.0857346	0.0256396	0.686738	0.0501755	0.0581204	0.0249578	0.577521		0.00306373	0.0286896	0.0016761
z8	530.303	0.125956	530.985	0.199043	533.92	0.937831	0.677465	0.89447	364.472	0.286104	1273.91	70767.1	0.0857416	0.024742	0.686982	0.0481373	0.0581364	0.0277261	0.45948		0.00102119	0.0123527	0.000720251
z9	530.228	0.104828	530.927	0.217926	533.935	0.9841	0.694419	0.890511	185.438	0.159951	1159.35	64464.3	0.0857289	0.0205947	0.686885	0.0527085	0.0581368	0.0308911	0.544408		0.00134166	0.0144548	0.000811917
z10	530.242	0.0943134	530.559	0.337641	531.924	1.68498	0.316228	0.893435	200.407	0.954978	209.855	11676.5	0.0857313	0.0185284	0.686274	0.0817065	0.0580834	0.0696626	0.363379		0.00212355	0.0237605	0.00140907
z11	529.527	0.208883	530.39	0.441707	534.104	2.29209	0.856938	0.891773	103.313	0.270994	381.238	21204.3	0.085611	0.0410894	0.685993	0.106916	0.0581413	0.0994728	0.245646		0.000668018	0.00383315	0.000225566
z12	530.89	0.279642	531.144	0.447015	532.235	2.12165	0.252589	0.890296	96.2889	0.162884	591.149	32882.4	0.0858405	0.0548728	0.687246	0.108083	0.0580916	0.09121	0.44746		0.000937911	0.0042077	0.000246512
z13	529.723	0.43628	530.322	0.612863	532.901	3.02216	0.596332	0.892107	53.9699	0.159251	338.898	18850.5	0.0856439	0.0857904	0.68588	0.148358	0.0581093	0.134095	0.405516		0.000852976	0.002625	0.000154786
z14	530.11	0.109374	530.103	0.371554	530.073	1.89241	-0.00704069	0.892911	71.0196	0.319418	222.341	12372	0.0857091	0.0214922	0.685516	0.0899719	0.0580343	0.0799703	0.283258		0.00526658	0.0132129	0.000783723
z15	530.27	0.222758	530.599	0.296513	532.017	1.46912	0.32834	0.890336	132.905	0.366878	362.259	20157.4	0.085736	0.0437599	0.686341	0.0717496	0.0580859	0.0585973	0.408177		0.00136777	0.00996188	0.000585933
z16	530.093	0.138775	530.326	0.783614	531.33	4.01947	0.232817	0.893115	45.3851	0.472344	96.0847	5356.78	0.0857062	0.0272704	0.685887	0.189692	0.0580676	0.18058	0.294932		0.00127122	0.00326949	0.000199102
z17	530.423	0.231079	531.766	1.43942	537.532	7.62734	1.32252	0.893382	27.7767	0.26175	106.119	5913.19	0.0857618	0.0453819	0.688279	0.347727	0.0582324	0.34706	0.0461539		0.00108663	0.00156324	9.52151e-05
z18	530.031	0.227735	531.224	1.09407	536.354	5.56238	1.17897	0.8939	12.9038	0.155438	83.0158	4629.4	0.0856958	0.0447569	0.687379	0.264505	0.0582011	0.252061	0.311069		0.00293292	0.00187592	0.000116171
one shard aliquoted
z21	528.462	1.09955	525.404	10.2358	512.14	55.0668	-3.18704	0.897732	1.71516	0.176804	9.70094	557.191	0.0854315	0.216711	0.677734	2.49548	0.0575617	2.50564	-0.00453057		0.00345479	0.000305968	2.69949e-05
z22	531.318	0.967266	536.713	9.22391	559.708	48.1094	5.07231	0.892392	1.94816	0.208552	9.34135	537.403	0.0859125	0.189656	0.696525	2.21263	0.0588265	2.20679	0.0723304		0.00406946	0.000390099	3.51456e-05
z28	530.758	0.756211	530.532	6.25643	529.557	32.7682	-0.226815	0.894321	2.87523	0.164018	17.5299	992.298	0.0858183	0.148423	0.686228	1.51406	0.0580205	1.49522	0.172828		0.00292013	0.000365987	2.78577e-05
z30	529.961	0.609006	533.607	6.9336	549.224	36.7942	3.50727	0.88931	3.93991	0.161749	24.3582	1372.61	0.085684	0.119704	0.691343	1.67058	0.0585445	1.68464	-0.0847298		0.00139637	0.000254009	1.82263e-05
z34	530.234	0.408616	532.301	3.98593	541.172	20.6119	2.02108	0.893161	4.73989	0.152795	31.0212	1741.71	0.08573	0.080276	0.68917	0.962159	0.0583291	0.942053	0.282781		0.00131232	0.000318849	2.17663e-05
z35	530.707	0.341075	533.027	2.45483	542.972	12.8078	2.25897	0.894233	5.75391	0.165734	34.7177	1946.49	0.0858096	0.0669499	0.690378	0.591954	0.0583772	0.585002	0.146567		0.00352125	0.000962015	6.47462e-05
a Isotopic dates calculated using λ238 = 1.55125E-10 (Jaffey et al. 1971) and λ235 = 9.8485E-10 (Jaffey et al. 1971).
b % discordance = 100 - (100 * (206Pb/238U date) / (207Pb/206Pb date))
c Th contents calculated from radiogenic 208Pb and 230Th-corrected 206Pb/238U date of the sample, assuming concordance between U-Pb Th-Pb systems.
d Total mass of radiogenic Pb.
e Total mass of common Pb.
f Ratio of radiogenic Pb (including 208Pb) to common Pb.
g Measured ratio corrected for fractionation and spike contribution only.
h Measured ratios corrected for fractionation, tracer and blank.
